# Supplementary material for: High responsivity and low dark current nonpolar GaN-based ultraviolet photo-detectors
Source: Royal Society of Chemistry journal article supplement (doi:10.1039/c8tc02281j), 2018-01-01
Supplement: c8tc02281j1.pdf [file c8tc02281j1.pdf]

## Supporting Information

### **High responsivity and low dark current nonpolar GaN-based ultraviolet photo-detectors**

Wenliang Wang,<sup>a, b, c</sup> Zhichao Yang,<sup>a</sup> Zhenya Lu<sup>c, \*</sup> and Guoqiang Li<sup>a, b, c, \*</sup>

<sup>a</sup>State Key Laboratory of Luminescent Materials and Devices, South China University of Technology, Guangzhou 510640, China.

<sup>b</sup>Guangdong Choicore Optoelectronics Co., Ltd. Heyuan 517003, China.

<sup>c</sup>Department of Electronic Materials, School of Materials Science and Engineering, South China University of Technology, Guangzhou 510640, China

\*Corresponding author, E-mail: [zhylu@scut.edu.cn](mailto:zhylu@scut.edu.cn) and [msgli@scut.edu.cn](mailto:msgli@scut.edu.cn), Tel.: 0086 20 87112957.

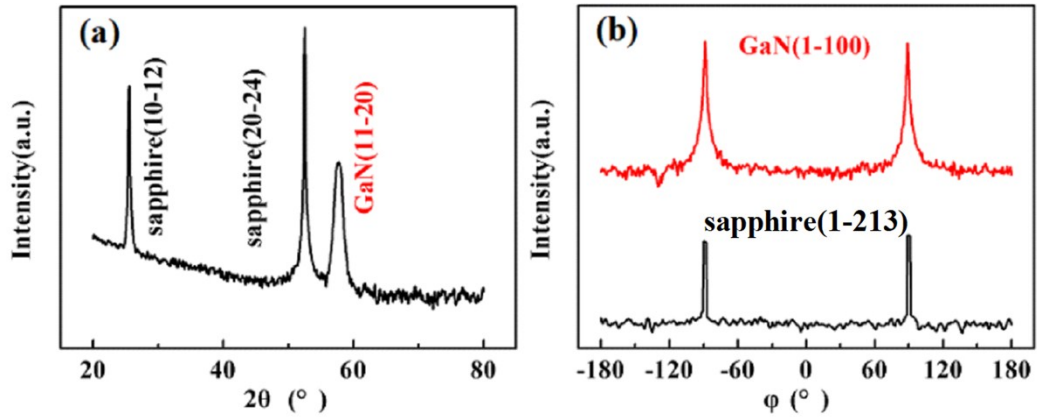

**Figure S1.** (a) XRD  $2\theta$ - $\omega$  and (b)  $\phi$  scans for *a*-plane GaN epitaxial films grown on *r*-plane sapphire substrates

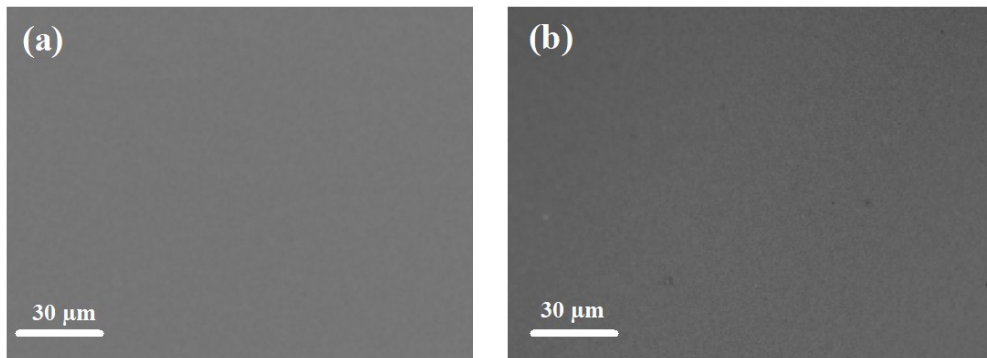

**Figure S2.** Optical microscopy image for nonpolar GaN epitaxial films of (a) sample 1 and (b) sample 2

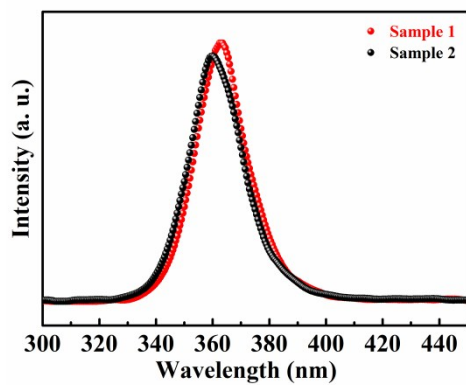

**Figure S3.** Photoluminescence spectra for nonpolar GaN epitaxial films in sample 1 and sample 2
